# Supplementary material
Source: PubMed Central journal article supplement (PMC5572820)
Supplement: NIHMS878121-supplement-1.pdf [file NIHMS878121-supplement-1.pdf]

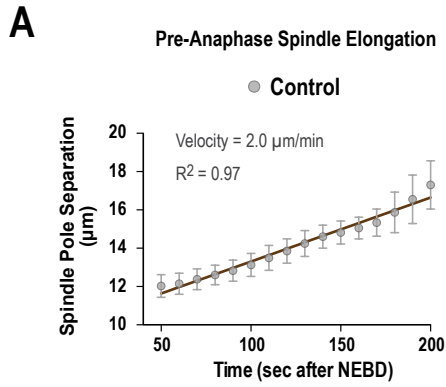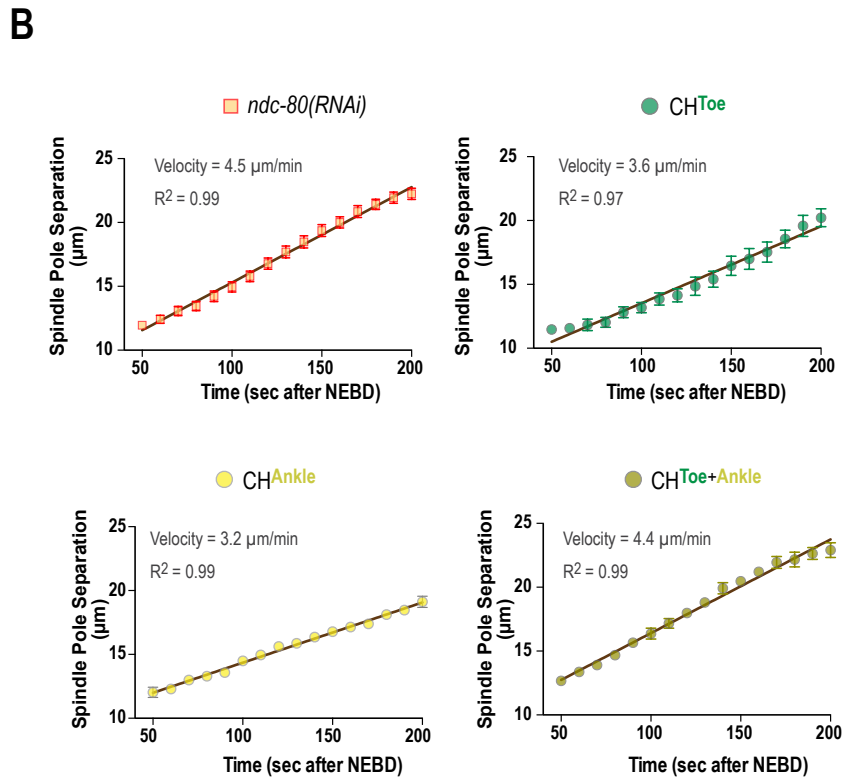

**Figure S1 (Related to Figure 1). Pre-anaphase spindle pole separation rates in control and NDC-80 CH Domain mutants.**

Linear regression fits were used to determine pole separation velocity for control (no RNAi) **(A)** and NDC-80 depletion as well as engineered CH domain mutants **(B)**. R squared values indicate the goodness of fit. The plotted data are the same as in *Fig. 1D*.

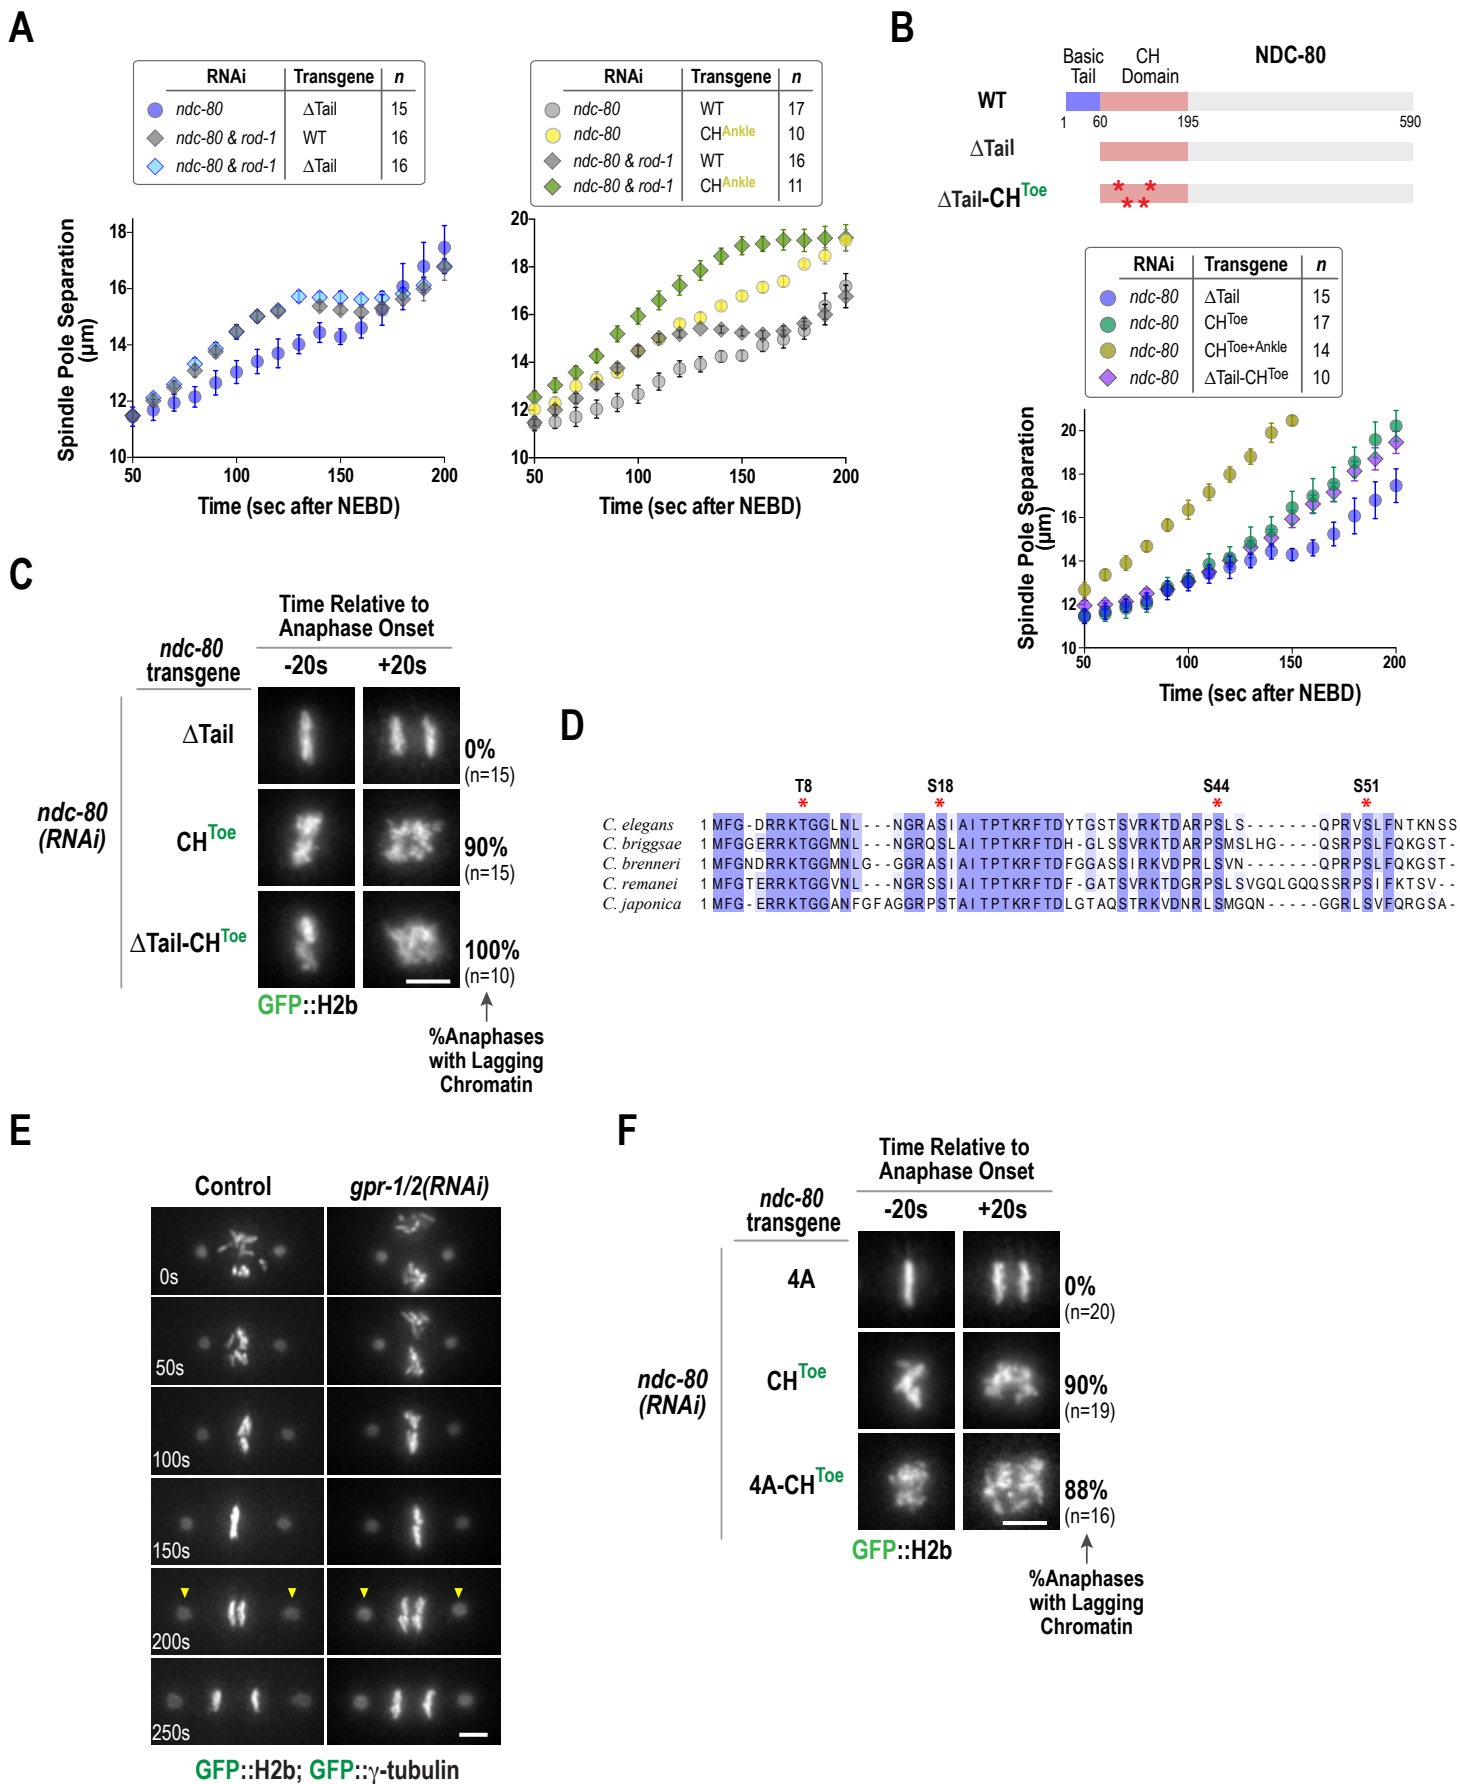

**Figure S2 (Related to Figure 2). Phenotypic analysis of NDC-80 N-tail deletion, G $\alpha$  pathway inhibition, and NDC-80 non-phosphorylatable 4A mutant.**

**(A)** Spindle pole separation analysis of the indicated conditions. WT and CH<sup>Ankle</sup> data are the same as in *Fig. 1B & 1D*.

**(B)** Spindle pole separation analysis of the indicated conditions. CH<sup>toe</sup> and CH<sup>Toe + Ankle</sup> data is the same as in *Fig. 1D* and  $\Delta$ Tail data is the same as in *Fig. 2A*.

**(C)** Chromosome segregation phenotypes for the indicated conditions highlighted by image stills from time-lapse movies 20 sec prior to and after anaphase onset. Numbers on right indicate percentage of one-cell embryo anaphases with detectable lagging chromatin. Scale bar, 5  $\mu$ m.

**(D)** Sequence alignment of the NDC-80 N-tail from related nematode species. 4 conserved putative Aurora kinase phosphorylation sites are marked by asterisks.

**(E)** Stills from time-lapse sequences of control and G $\alpha$  pathway-inhibited embryos in a strain co-expressing GFP::H2b and GFP- $\gamma$ -tubulin. Scale bar, 5  $\mu$ m.

**(F)** Chromosome segregation phenotypes for the indicated conditions highlighted by image stills from time-lapse movies 20 sec prior to and after anaphase onset. Numbers on right indicate percentage of one-cell embryo anaphases with detectable lagging chromatin. Scale bar, 5  $\mu$ m.

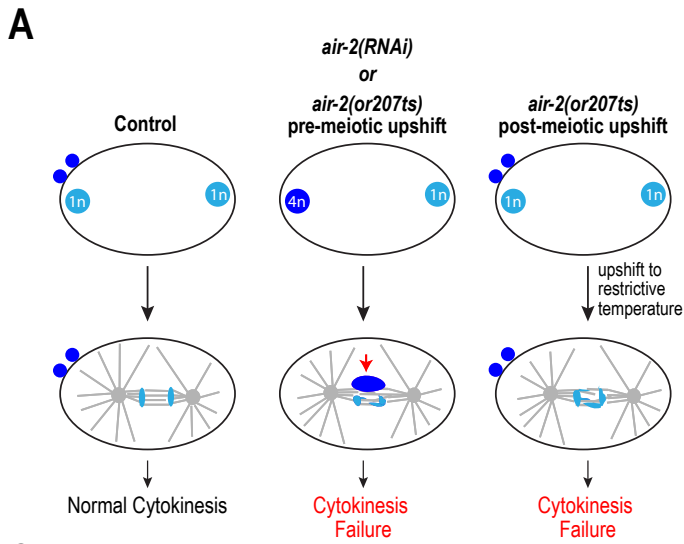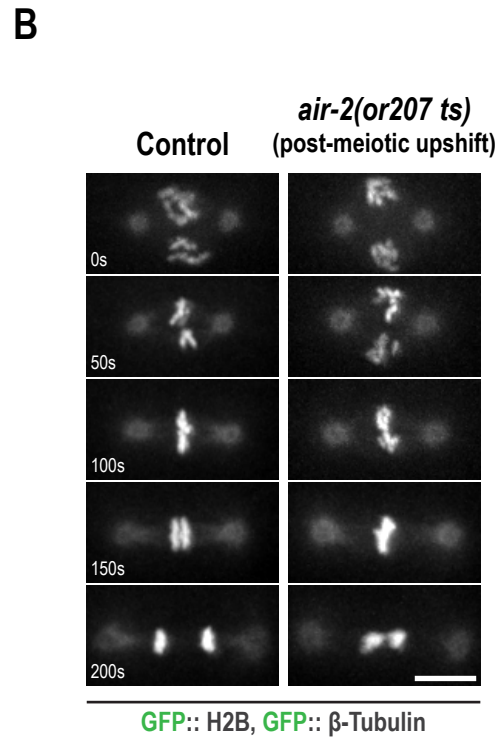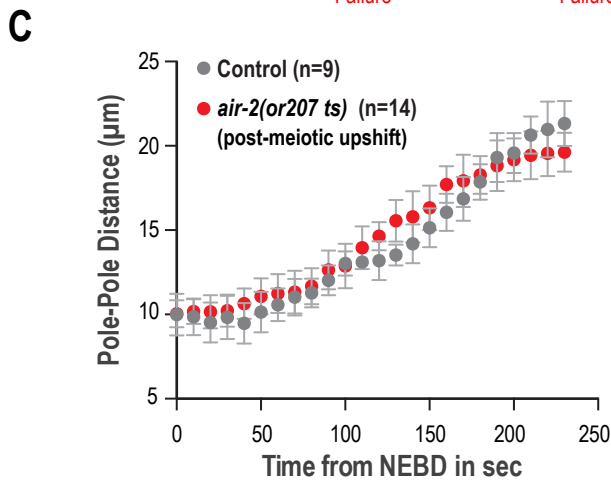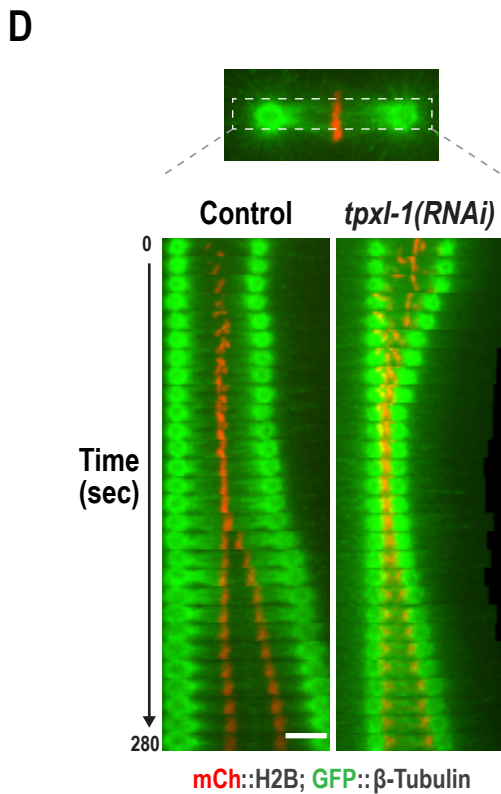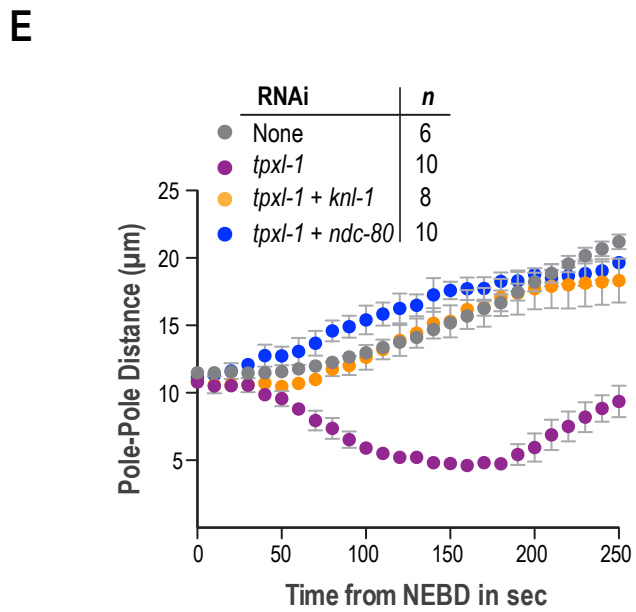

**Figure S3 (Related to Figure 2). Spindle pole separation analysis for a temperature-sensitive mutant of Aurora B/AIR-1 and depletion of the Aurora A/AIR-1 activator TPXL-1.**

**(A)** Schematics describing phenotypes associated with Aurora B/AIR-2 inhibition in the one-cell *C. elegans* embryo. Following *air-2(RNAi)* or inactivation of the *air-2(or207ts)* mutant (Severson et al., 2000) prior to meiosis, oocyte meiotic segregation fails and the unsegregated maternal genome interferes with the zygotic division (*middle panels*). To avoid this mass of unsegregated DNA, the temperature up-shift in the *air-2(or207ts)* mutant is performed after meiosis is completed. Adapted from (Lewellyn et al., 2011) .

**(B)** Stills from time-lapse sequences depicting phenotype observed following Aurora B/AIR-2 inhibition employing the post-meiotic upshift protocol in the *air-2(or207ts)* mutant. All up-shifted mutant embryos exhibited segregation defects, premature decondensation of chromosomes, and failed cytokinesis. Scale bar 5  $\mu\text{m}$ .

**(C)** Pole separation analysis of control and *air-2(or207ts)* mutant embryos imaged after post-meiotic upshift. Error bars are the 95% confidence interval. Inactivation of Aurora B by this approach does not result in the spindle pole separation phenotype observed with  $\text{NDC-80}^{4A}$ .

**(D)** Kymograph of the spindle region for a control embryo or following *tpxl-1(RNAi)* in a strain co-expressing mCh::H2b and GFP:: $\beta$ -tubulin. As shown previously, TPXL-1 depletion leads to spindle pole shortening after NEBD (Ozlu et al., 2005). The same phenotype is observed following selective mutation of TPXL-1 binding to Aurora A/AIR-1 ((Ozlu et al., 2005). Scale bar. 5  $\mu\text{m}$ .

**(E)** Pole separation analysis for the indicated conditions. The effect of TPXL-1 depletion on pole separation is dependent on KNL-1 and on NDC-80. Kinetochore dynein depletion using *rod-1(RNAi)* does not affect the TPXL-1 phenotype (*not shown*). This result suggests that TPXL-1-activated

Aurora A/AIR-1 controls NDC-80-mediated attachments at kinetochores, as the effect of TPXL-1 depletion on pole separation is suppressed by NDC-80 depletion.

**A**

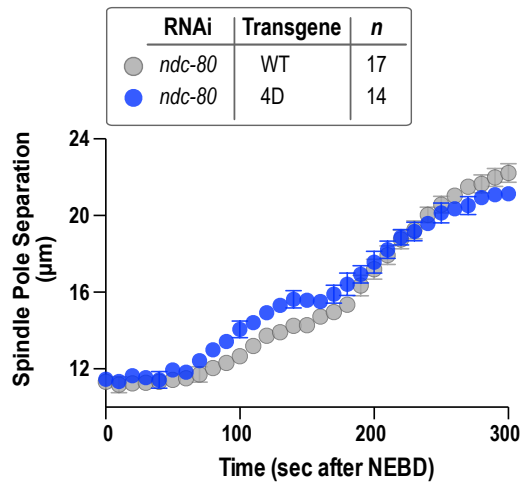

**B**

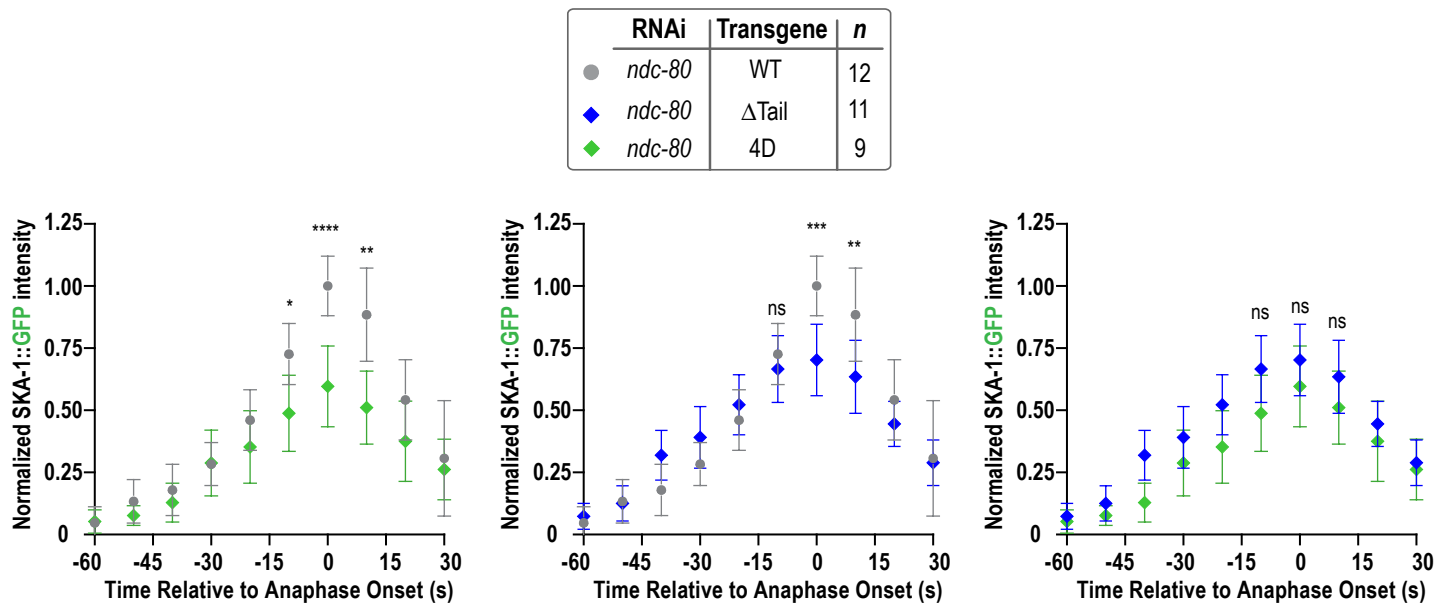



**Figure S4 (Related to Figure 3). Spindle pole separation analysis for phosphomimetic NDC-80 and analysis of SKA-1::GFP chromosomal intensity.**

**(A)** Spindle pole separation analysis of WT and phosphomimetic (4D) NDC-80. WT NDC-80 data is the same as in *Fig. 1B*.

**(B)** Analysis of SKA-1::GFP chromosomal intensity relative to anaphase onset for the indicated conditions. The data shown in *Fig. 3F* is re-plotted and *p*-values (\*\*\*\*, \*\*\*, \*\*, \* and ns correspond to *p*-values of <0.001, 0.0001 to 0.001, 0.01 to 0.05 and ≥0.05 respectively) calculated using unpaired *t*-tests in GraphPad Prism (GraphPad Software). Error bars are the 95% confidence interval.

A

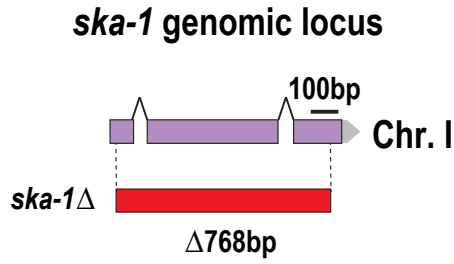

C

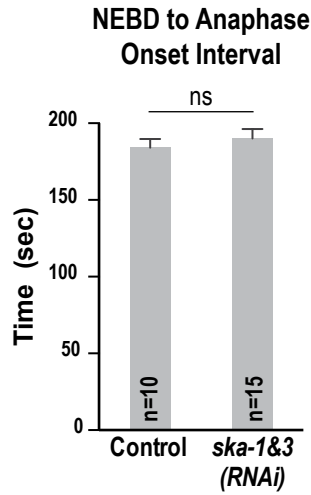

B

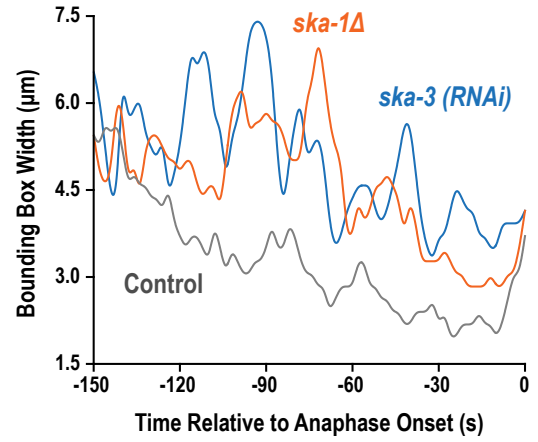

D

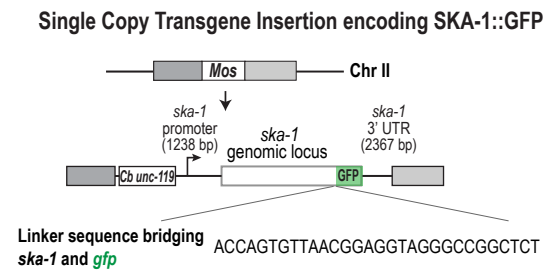

E

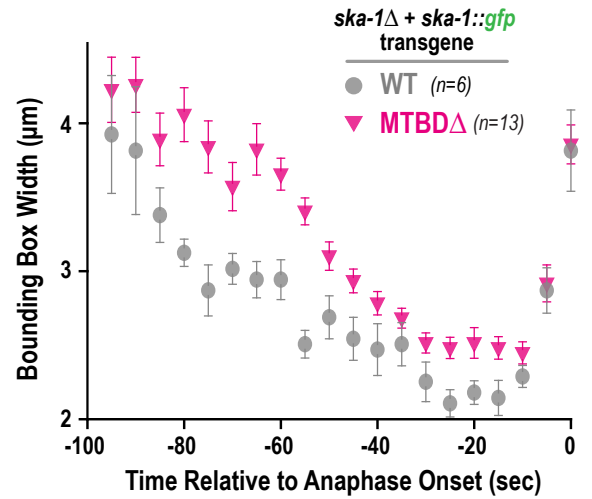

**Figure S5 (Related to Figures 4 & 5). *ska-1Δ* and analysis of SKA complex inhibition.**

**(A)** Schematic of the *ska-1* genomic locus and the *ska-1* deletion generated using CRISPR-Cas9. The deletion removes the majority of the *ska-1* coding region.

**(B)** Plots of the width of the bounding box that contains chromosomal fluorescence, measured as in *Fig. 4B*. Individual examples for control, *ska-1Δ* and *ska-3(RNAi)* are shown.

**(C)** Plot showing NEBD to anaphase onset interval in control and SKA-1/3 depleted embryos. There is no significant effect of SKA complex depletion on anaphase onset ( $p=0.14$ ). Error bars are the S.D.

**(D)** Schematic of the SKA-1::GFP transgene targeted to a single *Mos* insertion on chromosome II.

**(E)** Average plot of chromosome distribution along the spindle axis for the indicated conditions. Error bars are the SEM.

**Table S1: Oligonucleotides & templates used for dsRNA production** (Related to Method Details in STAR Methods section)

| <b>Gene</b>                                 | <b>Oligonucleotide 1</b>                                              | <b>Oligonucleotide 2</b>                                             | <b>Template</b>   |
|---------------------------------------------|-----------------------------------------------------------------------|----------------------------------------------------------------------|-------------------|
| W01B6.9<br>( <i>ndc-80</i> )                | 5'- aattaaccctcactaaagg<br>GATGACAAGTACATTCAGA<br>GATTATACAAATGATC-3' | 5'- taatcgactcactatagg<br>GTGGTTCAAGATTCATTTGA<br>ATATTAAGTCCACTG-3' | N2 cDNA           |
| Y106G6H.15<br>( <i>ska-1</i> )              | 5'- aattaaccctcactaaagg<br>TTATGGATAATAGAAAGTC<br>AACG-3'             | 5'- taatcgactcactatagg<br>ATGGAATCGTTTATTGATCG<br>GAT-3'             | N2 genomic<br>DNA |
| F54E7.8 ( <i>ska-3</i> )                    | 5'- aattaaccctcactaaagg<br>ATGGCTAACGAAACGCTG<br>GAACATG-3'           | 5'- taatcgactcactatagg<br>AACTCATCAAAGCCAGTTT<br>TCGTCTG-3'          | N2 genomic<br>DNA |
| F22B7.13/<br>C38C10.4<br>( <i>gpr-1/2</i> ) | 5'- aattaaccctcactaaagg<br>AGCATGTGATTCCACACGT<br>CGC -3'             | 5'- taatcgactcactatagg<br>TCTGGCAGCAGACAGTTCA<br>GTTC -3'            | N2 genomic<br>DNA |
| Y43F4B.6<br>( <i>klp-19</i> )               | 5'- aattaaccctcactaaagg<br>ATTGGGAGAGCTGGTGAA<br>TG-3'                | 5'- taatcgactcactatagg<br>GACTTTCCTACGTGCTTCGC-<br>3'                | N2 genomic<br>DNA |
| Y39G10AR.12<br>( <i>tpxl-1</i> )            | 5'- aattaaccctcactaaagg<br>GCGAACAAGGCAACAGCG<br>CCG-3'               | 5'- taatcgactcactatagg<br>TTTCTTCTCATACCCTTTGTA<br>GGAGCT-3'         | N2 genomic<br>DNA |

\* Lowercase letters denote T3 and T7 sequences included for RNA synthesis.
